# Supplementary material
Source: PubMed Central journal article supplement (PMC4959084)
Supplement: AEM.00452-16_zam999117127so1.pdf [file AEM.00452-16_zam999117127so1.pdf]

**Supplementary Figure 1.** PCR analysis confirms presence/absence of endohyphal bacteria in fungi. Gel shows PCR using bacterial primers 27F and 1492R with the following sources (left to right): genomic DNA from axenic *Luteibacter* sp. 9143; axenic *Luteibacter* sp. 9145; *Pestalotiopsis* sp. 9143 (naturally infected; outset of experiments); *Microdiplodia* sp. 9145 (naturally infected; outset of experiments); negative control (water); negative control for gel quality (blank); *Pestalotiopsis* sp. 9143 (naturally infected, at conclusion of experiments); *Pestalotiopsis* sp. 9143 (cured); *Pestalotiopsis* sp. 9143 (reinfected with *Luteibacter* sp. 9143); *Pestalotiopsis* sp. 9143 (cross-infected with *Luteibacter* sp. 9145); *Microdiplodia* sp. 9145 (naturally infected, at conclusion of experiments); *Microdiplodia* sp. 9145 (cured); *Microdiplodia* sp. 9145 (reinfected with *Luteibacter* sp. 9145); *Microdiplodia* sp. 9145 (cross-infected with *Luteibacter* sp. 9143); ladder.

**Supplementary Fig. 1**

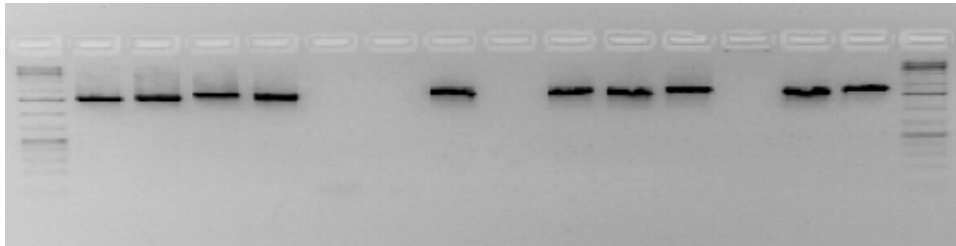

**Supplementary Figure 2.** Log<sub>10</sub> colony-forming units calculated for four replicate cultures of *Luteibacter* sp. 9143 in LB media after 1:100 dilution from overnight culture at 0, 24, and 72 hours after inoculation. After 24 h the cultures are in stationary phase. After 72 hours they form dense mucilaginous clumps.

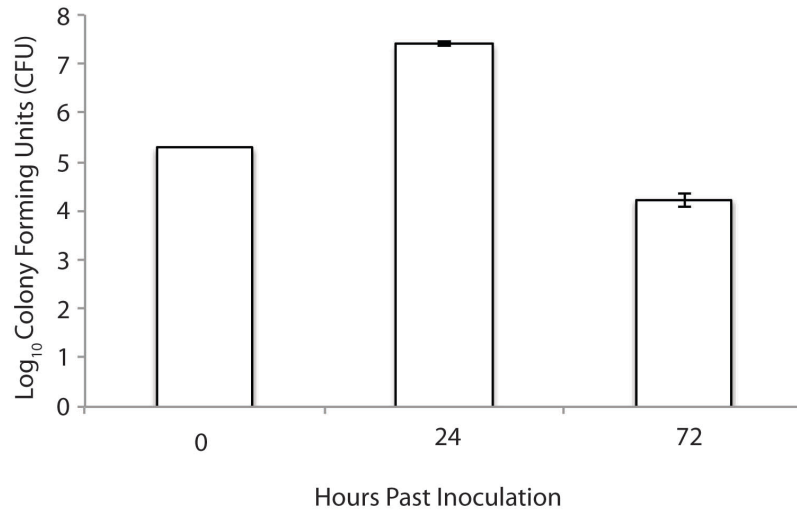

**Supplementary Table 1.** Columns indicate the parameters of the reintroduction protocol that were manipulated to evaluate factors influencing *in vitro* resynthesis of the endohyphal symbiosis of *Luteibacter* sp. 9143 in *Pestalotiopsis* sp. 9143. Rows define treatments. ‘Yes’ in the last column indicates the presence of EHB in the fungal cultures as defined in the methods above. A ‘-’ indicates bacteria were not viable after co-culturing. A ‘+’ indicates viable bacteria were present outside fungal cells. The treatment identical to resynthesis experiment 1 is underlined.

| <b>Age of bacterial culture</b> | <b>MgCl<sub>2</sub> wash</b> | <b>Concentration of PDB</b> | <b>Mycelium: bacteria ratio</b> | <b>Medium in co-culture transfers</b> | <b>Successful resynthesis</b> |
|---------------------------------|------------------------------|-----------------------------|---------------------------------|---------------------------------------|-------------------------------|
| 3 d                             | yes                          | 2.40%                       | 5:1                             | 1X PDA                                | no                            |
| <u>3 d</u>                      | <u>yes</u>                   | <u>2.40%</u>                | <u>5:1</u>                      | <u>water agar</u>                     | <u>yes</u>                    |
| 3 d                             | yes                          | 2.40%                       | 7:1                             | 1X PDA                                | no                            |
| 3 d                             | yes                          | 2.40%                       | 7:1                             | water agar                            | <b>yes</b>                    |
| 3 d                             | yes                          | 2.40%                       | 10:1                            | 1X PDA                                | no                            |
| 3 d                             | yes                          | 2.40%                       | 10:1                            | water agar                            | no                            |
| 3 d                             | yes                          | 0.1X                        | 5:1                             | 1X PDA                                | no                            |
| 3 d                             | yes                          | 0.1X                        | 5:1                             | water agar                            | <b>yes</b>                    |
| 3 d                             | yes                          | 0.1X                        | 7:1                             | 1X PDA                                | no                            |
| 3 d                             | yes                          | 0.1X                        | 7:1                             | water agar                            | <b>yes</b>                    |
| 3 d                             | yes                          | 0.1X                        | 10:1                            | 1X PDA                                | no                            |
| 3 d                             | yes                          | 0.1X                        | 10:1                            | water agar                            | no                            |
| 3 d                             | yes                          | 0.01X                       | 5:1                             | 1X PDA                                | no                            |
| 3 d                             | yes                          | 0.01X                       | 5:1                             | water agar                            | <b>yes</b>                    |
| 3 d                             | yes                          | 0.01X                       | 7:1                             | 1X PDA                                | <b>yes</b>                    |
| 3 d                             | yes                          | 0.01X                       | 7:1                             | water agar                            | <b>yes</b>                    |
| 3 d                             | yes                          | 0.01X                       | 10:1                            | 1X PDA                                | no                            |
| 3 d                             | yes                          | 0.01X                       | 10:1                            | water agar                            | <b>yes</b>                    |
| 3 d                             | yes                          | 0.001X                      | 5:1                             | 1X PDA                                | no                            |

|     |     |         |      |            |            |
|-----|-----|---------|------|------------|------------|
| 3 d | yes | 0.001X  | 5:1  | water agar | <b>yes</b> |
| 3 d | yes | 0.001X  | 7:1  | 1X PDA     | no         |
| 3 d | yes | 0.001X  | 7:1  | water agar | <b>yes</b> |
| 3 d | yes | 0.001X  | 10:1 | 1X PDA     | no         |
| 3 d | yes | 0.001X  | 10:1 | water agar | <b>yes</b> |
| 3 d | yes | 0.0001X | 5:1  | 1X PDA     | no         |
| 3 d | yes | 0.0001X | 5:1  | water agar | no         |
| 3 d | yes | 0.0001X | 7:1  | 1X PDA     | no         |
| 3 d | yes | 0.0001X | 7:1  | water agar | no         |
| 3 d | yes | 0.0001X | 10:1 | 1X PDA     | no         |
| 3 d | yes | 0.0001X | 10:1 | water agar | no         |
| 3 d | no  | 2.40%   | 5:1  | 1X PDA     | -          |
| 3 d | no  | 2.40%   | 5:1  | water agar | -          |
| 3 d | no  | 2.40%   | 7:1  | 1X PDA     | -          |
| 3 d | no  | 2.40%   | 7:1  | water agar | -          |
| 3 d | no  | 2.40%   | 10:1 | 1X PDA     | -          |
| 3 d | no  | 2.40%   | 10:1 | water agar | -          |
| 3 d | no  | 0.1X    | 5:1  | 1X PDA     | -          |
| 3 d | no  | 0.1X    | 5:1  | water agar | -          |
| 3 d | no  | 0.1X    | 7:1  | 1X PDA     | -          |
| 3 d | no  | 0.1X    | 7:1  | water agar | -          |
| 3 d | no  | 0.1X    | 10:1 | 1X PDA     | -          |
| 3 d | no  | 0.1X    | 10:1 | water agar | -          |
| 3 d | no  | 0.01X   | 5:1  | 1X PDA     | -          |
| 3 d | no  | 0.01X   | 5:1  | water agar | -          |
| 3 d | no  | 0.01X   | 7:1  | 1X PDA     | -          |
| 3 d | no  | 0.01X   | 7:1  | water agar | -          |
| 3 d | no  | 0.01X   | 10:1 | 1X PDA     | -          |

|     |     |         |      |            |            |
|-----|-----|---------|------|------------|------------|
| 3 d | no  | 0.01X   | 10:1 | water agar | -          |
| 3 d | no  | 0.001X  | 5:1  | 1X PDA     | -          |
| 3 d | no  | 0.001X  | 5:1  | water agar | -          |
| 3 d | no  | 0.001X  | 7:1  | 1X PDA     | -          |
| 3 d | no  | 0.001X  | 7:1  | water agar | -          |
| 3 d | no  | 0.001X  | 10:1 | 1X PDA     | -          |
| 3 d | no  | 0.001X  | 10:1 | water agar | -          |
| 3 d | no  | 0.0001X | 5:1  | 1X PDA     | -          |
| 3 d | no  | 0.0001X | 5:1  | water agar | -          |
| 3 d | no  | 0.0001X | 7:1  | 1X PDA     | -          |
| 3 d | no  | 0.0001X | 7:1  | water agar | -          |
| 3 d | no  | 0.0001X | 10:1 | 1X PDA     | -          |
| 3 d | no  | 0.0001X | 10:1 | water agar | -          |
| 1 d | yes | 2.40%   | 5:1  | 1X PDA     | +          |
| 1 d | yes | 2.40%   | 5:1  | water agar | no         |
| 1 d | yes | 2.40%   | 7:1  | 1X PDA     | +          |
| 1 d | yes | 2.40%   | 7:1  | water agar | no         |
| 1 d | yes | 2.40%   | 10:1 | 1X PDA     | +          |
| 1 d | yes | 2.40%   | 10:1 | water agar | <b>yes</b> |
| 1 d | yes | 0.1X    | 5:1  | 1X PDA     | +          |
| 1 d | yes | 0.1X    | 5:1  | water agar | no         |
| 1 d | yes | 0.1X    | 7:1  | 1X PDA     | no         |
| 1 d | yes | 0.1X    | 7:1  | water agar | <b>yes</b> |
| 1 d | yes | 0.1X    | 10:1 | 1X PDA     | no         |
| 1 d | yes | 0.1X    | 10:1 | water agar | <b>yes</b> |
| 1 d | yes | 0.01X   | 5:1  | 1X PDA     | no         |
| 1 d | yes | 0.01X   | 5:1  | water agar | <b>yes</b> |
| 1 d | yes | 0.01X   | 7:1  | 1X PDA     | no         |

|     |     |         |      |            |            |
|-----|-----|---------|------|------------|------------|
| 1 d | yes | 0.01X   | 7:1  | water agar | <b>yes</b> |
| 1 d | yes | 0.01X   | 10:1 | 1X PDA     | no         |
| 1 d | yes | 0.01X   | 10:1 | water agar | <b>yes</b> |
| 1 d | yes | 0.001X  | 5:1  | 1X PDA     | no         |
| 1 d | yes | 0.001X  | 5:1  | water agar | no         |
| 1 d | yes | 0.001X  | 7:1  | 1X PDA     | no         |
| 1 d | yes | 0.001X  | 7:1  | water agar | <b>yes</b> |
| 1 d | yes | 0.001X  | 10:1 | 1X PDA     | no         |
| 1 d | yes | 0.001X  | 10:1 | water agar | <b>yes</b> |
| 1 d | yes | 0.0001X | 5:1  | 1X PDA     | no         |
| 1 d | yes | 0.0001X | 5:1  | water agar | no         |
| 1 d | yes | 0.0001X | 7:1  | 1X PDA     | no         |
| 1 d | yes | 0.0001X | 7:1  | water agar | no         |
| 1 d | yes | 0.0001X | 10:1 | 1X PDA     | no         |
| 1 d | yes | 0.0001X | 10:1 | water agar | no         |
| 1 d | no  | 2.40%   | 5:1  | 1X PDA     | -          |
| 1 d | no  | 2.40%   | 5:1  | water agar | -          |
| 1 d | no  | 2.40%   | 7:1  | 1X PDA     | -          |
| 1 d | no  | 2.40%   | 7:1  | water agar | -          |
| 1 d | no  | 2.40%   | 10:1 | 1X PDA     | -          |
| 1 d | no  | 2.40%   | 10:1 | water agar | -          |
| 1 d | no  | 0.1X    | 5:1  | 1X PDA     | -          |
| 1 d | no  | 0.1X    | 5:1  | water agar | -          |
| 1 d | no  | 0.1X    | 7:1  | 1X PDA     | -          |
| 1 d | no  | 0.1X    | 7:1  | water agar | -          |
| 1 d | no  | 0.1X    | 10:1 | 1X PDA     | -          |
| 1 d | no  | 0.1X    | 10:1 | water agar | -          |
| 1 d | no  | 0.01X   | 5:1  | 1X PDA     | -          |

|     |    |         |      |            |   |
|-----|----|---------|------|------------|---|
| 1 d | no | 0.01X   | 5:1  | water agar | - |
| 1 d | no | 0.01X   | 7:1  | 1X PDA     | - |
| 1 d | no | 0.01X   | 7:1  | water agar | - |
| 1 d | no | 0.01X   | 10:1 | 1X PDA     | - |
| 1 d | no | 0.01X   | 10:1 | water agar | - |
| 1 d | no | 0.001X  | 5:1  | 1X PDA     | - |
| 1 d | no | 0.001X  | 5:1  | water agar | - |
| 1 d | no | 0.001X  | 7:1  | 1X PDA     | - |
| 1 d | no | 0.001X  | 7:1  | water agar | - |
| 1 d | no | 0.001X  | 10:1 | 1X PDA     | - |
| 1 d | no | 0.001X  | 10:1 | water agar | - |
| 1 d | no | 0.0001X | 5:1  | 1X PDA     | - |
| 1 d | no | 0.0001X | 5:1  | water agar | - |
| 1 d | no | 0.0001X | 7:1  | 1X PDA     | - |
| 1 d | no | 0.0001X | 7:1  | water agar | - |
| 1 d | no | 0.0001X | 10:1 | 1X PDA     | - |
| 1 d | no | 0.0001X | 10:1 | water agar | - |

---
